# Supplementary material
Source: Elsevier journal article supplement (https://rcastoragev2.blob.core.windows.net/2426afa3650ddbcd2a1a5e4f6935e6ab/mmc1.pdf)
Supplement: mmc1 [file mmc1.pdf]

**Cell Reports, Volume 33**

**Supplemental Information**

**Ca<sup>2+</sup> Release by IP<sub>3</sub> Receptors Is  
Required to Orient the Mitotic Spindle**

**Raul Lagos-Cabré, Adelina Ivanova, and Colin W. Taylor**

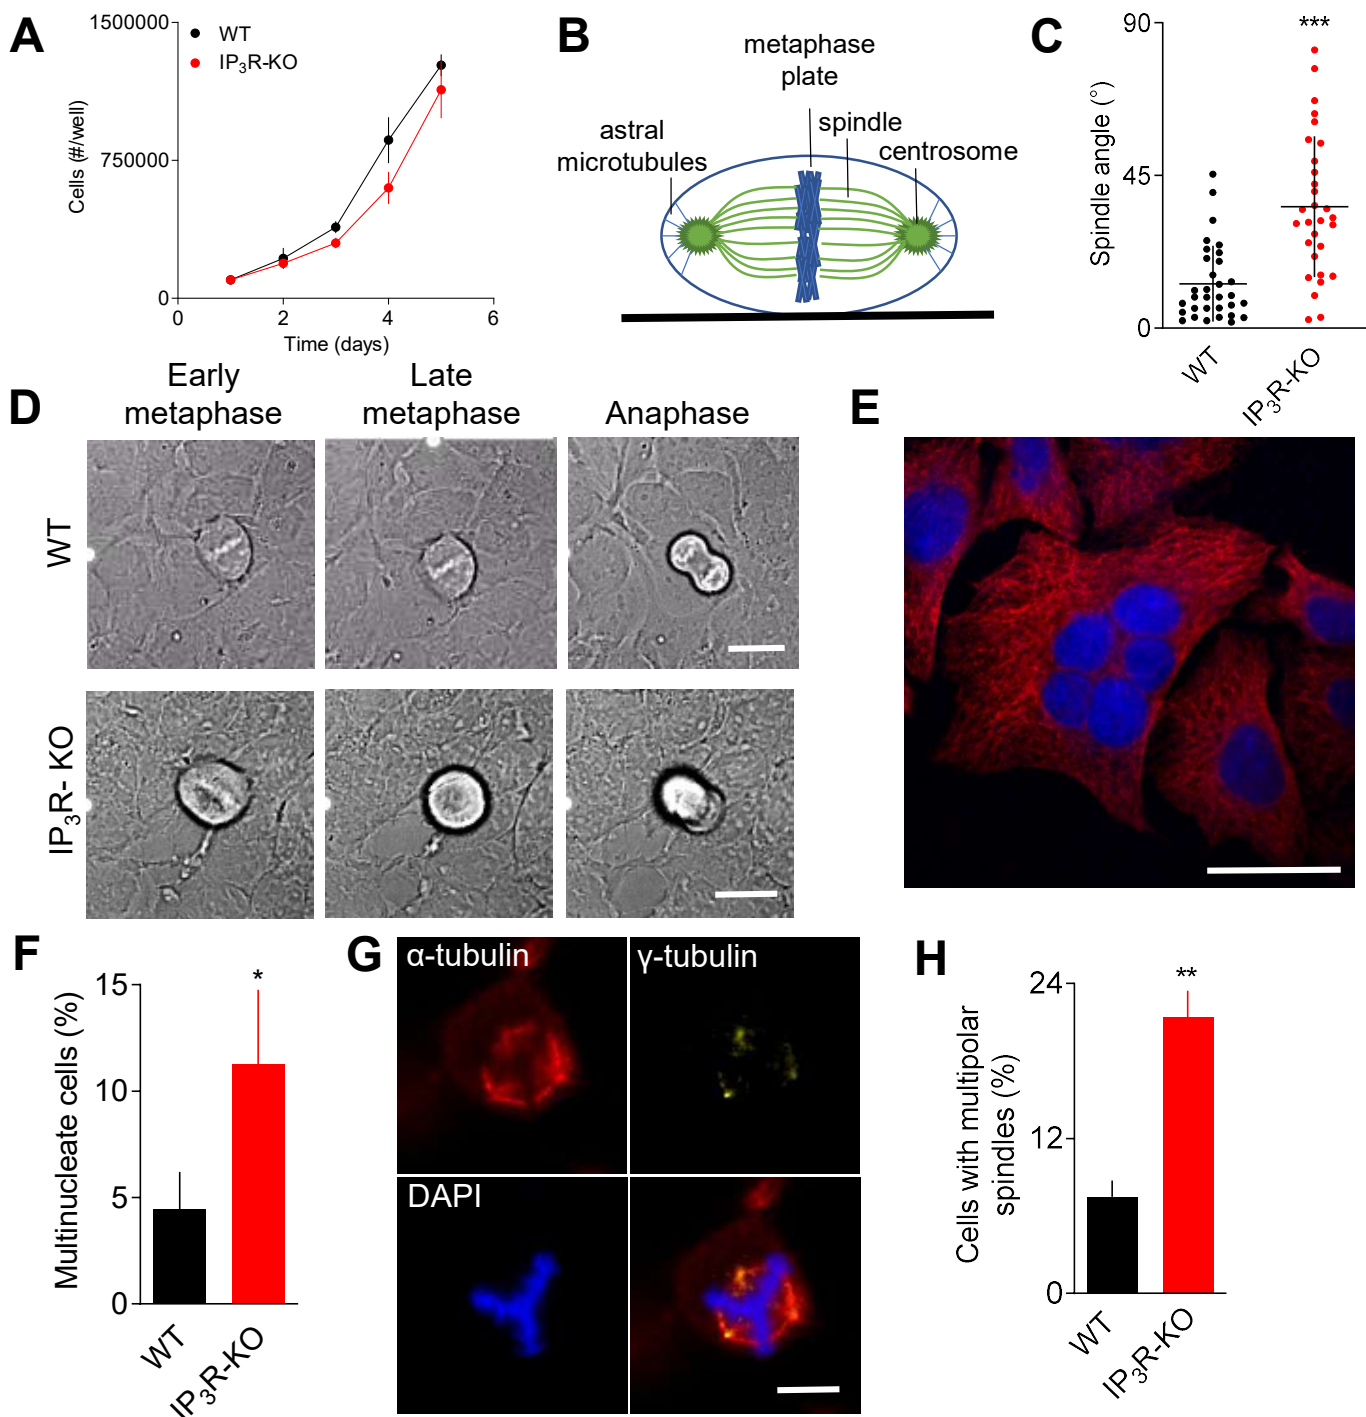

**Figure S1. Cells Without IP<sub>3</sub>Rs Proliferate Normally But With Aberrant Spindles. Related to Figure 1.**

(A) Numbers of cells/well for cells plated on day 1 with 100,000 cells/well. Mean  $\pm$  SD from 3 experiments.

(B) In normal cells, the metaphase plate aligns perpendicular to the substratum, with the mitotic spindle parallel to it.

(C) Spindle angles measured in fixed WT and HEK-IP<sub>3</sub>R-KO cells using  $\gamma$ -tubulin staining to identify centrosomes. Individual values mean  $\pm$  SD from 3 experiments. \*\*\* $P$  < 0.001, Student's  $t$ -test.

(D) Brightfield images show that both daughter cells remain attached to the substratum during anaphase of a WT cell, while in the HEK-IP<sub>3</sub>R-KO cell only one daughter cell remains attached. Scale bars = 20  $\mu$ m

(E) Image of a multinucleate HEK-IP<sub>3</sub>R-KO cell stained with  $\alpha$ -tubulin (red) and DAPI (blue). Scale bar = 20  $\mu$ m.

(F) Summary shows numbers of multinucleate cells. Mean  $\pm$  SEM,  $n$  = 8 experiments, with 10 cells analysed in each. \* $P$  < 0.05, Student's  $t$ -test.

(G) Typical example of a multipolar spindle in a HEK-IP<sub>3</sub>R-KO cell stained for  $\alpha$ -tubulin (red),  $\gamma$ -tubulin (yellow) and DNA (blue). Scale bar = 10  $\mu$ m.

(H) Summary shows numbers of cells with multipolar spindles. Mean  $\pm$  SEM,  $n$  = 3 dishes with 11 fields quantified in each. \*\* $P$  < 0.01, Student's  $t$ -test.

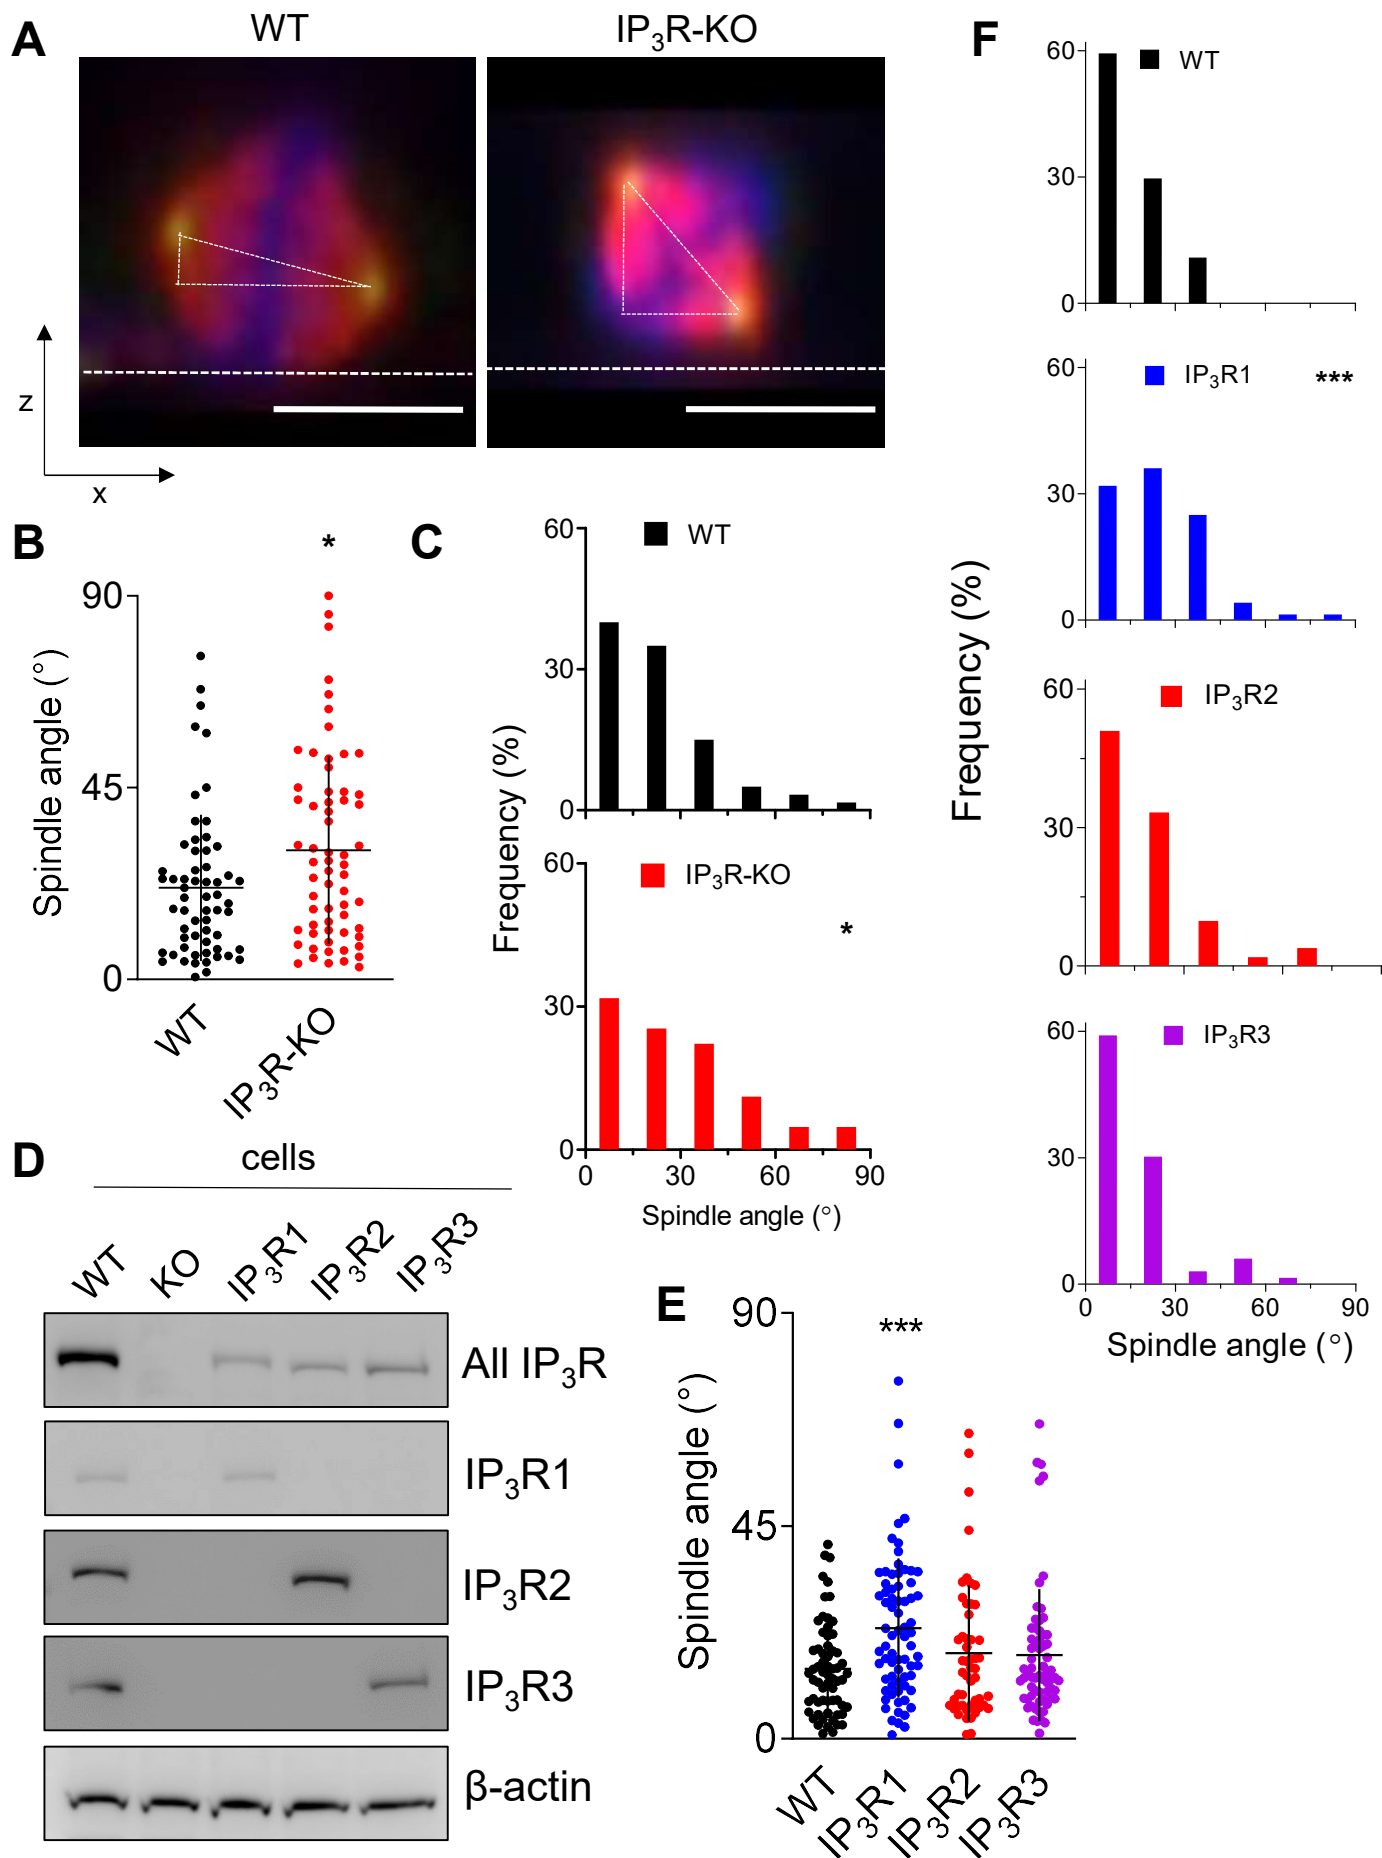

**Figure S2. Spindle Angles in HAP1 Cells Without IP<sub>3</sub>Rs and in HEK Cells Expressing Single IP<sub>3</sub>R Subtypes. Related to Figure 1.**  
 Legend on next page.

**Figure S2. Spindle Angles in HAP1 Cells Without IP<sub>3</sub>Rs and in HEK Cells Expressing Single IP<sub>3</sub>R Subtypes. Related to Figure 1.**

Figure on preceding page.

(A) Confocal z-stack images from fixed HAP1 cells show spindle angles during metaphase for a WT and HAP1-IP<sub>3</sub>R-KO cell. The cells are immunostained for  $\alpha$ -tubulin (red) and  $\gamma$ -tubulin (green), and stained with DAPI (blue) for chromosomes. Scale bars = 10  $\mu$ m.

(B) Spindle angles for WT and HAP1-IP<sub>3</sub>R-KO cells. Individual values, mean  $\pm$  SD from 5 experiments. \* $P$  < 0.05, Student's  $t$ -test.

(C) Frequency distribution of the spindle angles (data from panel B). \* $P$  < 0.05, relative to WT,  $\chi^2$  test for trend.

(D) Typical western blots, using antibodies selective for IP<sub>3</sub>R subtypes (IP<sub>3</sub>R1-3) or an antibody that recognizes all three IP<sub>3</sub>R subtypes (all IP<sub>3</sub>R), show expression of IP<sub>3</sub>R subtypes in WT HEK cells, HEK-IP<sub>3</sub>R-KO cells and cells expressing single native IP<sub>3</sub>R subtypes (Alzayady et al., 2016). The results replicate our previous analyses, which established that the HEK cell line used expresses 36% IP<sub>3</sub>R1, 18% IP<sub>3</sub>R2 and 45% IP<sub>3</sub>R3 (Mataragka and Taylor, 2018).

(E) Spindle angles of cells expressing single IP<sub>3</sub>R subtypes. Results show individual values, mean  $\pm$  SD from 5 experiments. \*\*\* $P$  < 0.001 relative to WT, ANOVA with Bonferroni test.

(F) Frequency distribution of spindle angles (data from panel B). \*\*\* $P$  < 0.001, relative to WT,  $\chi^2$  test for trend.

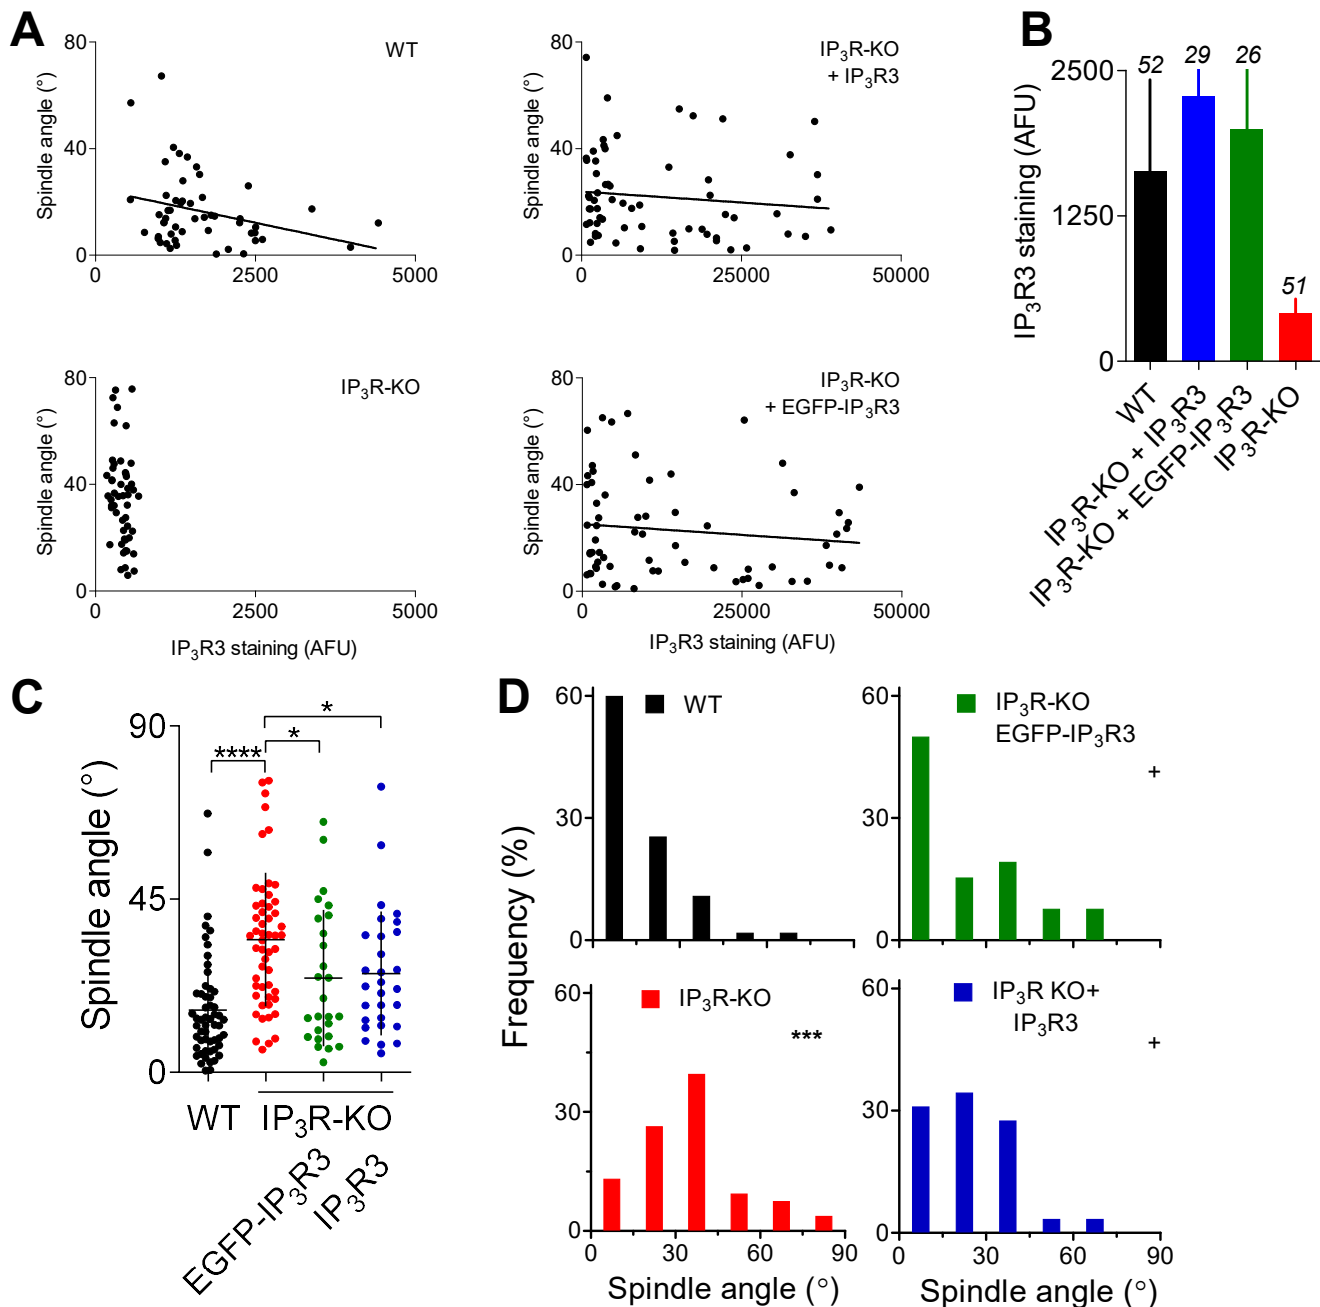

**Figure S3. IP<sub>3</sub>R3 and EGFP-IP<sub>3</sub>R3 Similarly Rescue Spindle Alignment. Related to Figure 1.**

(A) Relationships between immunostaining for IP<sub>3</sub>R3 and spindle angle measured under identical conditions for WT and HEK-IP<sub>3</sub>R-KO cells, or the latter expressing IP<sub>3</sub>R3 or EGFP-IP<sub>3</sub>R3. Points are from individual cells taken from 5 experiments. AFU, arbitrary fluorescence units (note the ten-fold difference in scale for WT and IP<sub>3</sub>R-KO cells relative to transfected cells). For IP<sub>3</sub>R-KO cells, all cells contributed to the analysis; whereas for the other cells only those with detectable immunostaining were included. From least-squares linear regression, the only slope to differ significantly from 0 was for WT cells ( $P < 0.0001$ ). The results suggest firstly that the level of IP<sub>3</sub>R expression in WT cells may contribute to whether the spindle aligns appropriately, and secondly that even massive over-expression of IP<sub>3</sub>R does not perturb spindle alignment. Summary results in **Figures 1I and 1J**.

(B) Cells heterologously expressing IP<sub>3</sub>R3 were selected (by immunostaining) to approximately match WT in their expression of IP<sub>3</sub>R3. Note that in WT cells IP<sub>3</sub>R3 comprises only ~45% of the IP<sub>3</sub>Rs expressed (Mataragka and Taylor, 2018), whereas IP<sub>3</sub>R3 is the only subtype in heterologously-expressing cells. Results show relative expression levels of IP<sub>3</sub>R3 for cells used in the analyses shown in panels C and D.

(C) Spindle angles measured in the indicated cells, approximately matched for their expression of IP<sub>3</sub>R3 (see panel B). Individual values, mean ± SD. \*\*\*\* $P < 0.0001$ , \* $P < 0.05$ , one-way ANOVA with Holm-Sidak multiple comparisons test, relative to HEK-IP<sub>3</sub>R-KO cells.

(D) Distributions of spindle angles (data from panel C). \*\*\* $P < 0.001$ , relative to WT, + $P < 0.05$  relative to IP<sub>3</sub>R-KO,  $\chi^2$  test for trend. Results shown here comprise a subset of the data (cells with IP<sub>3</sub>R3 expression approximately matching expression in WT cells) shown in **Figures 1I and 1J**.

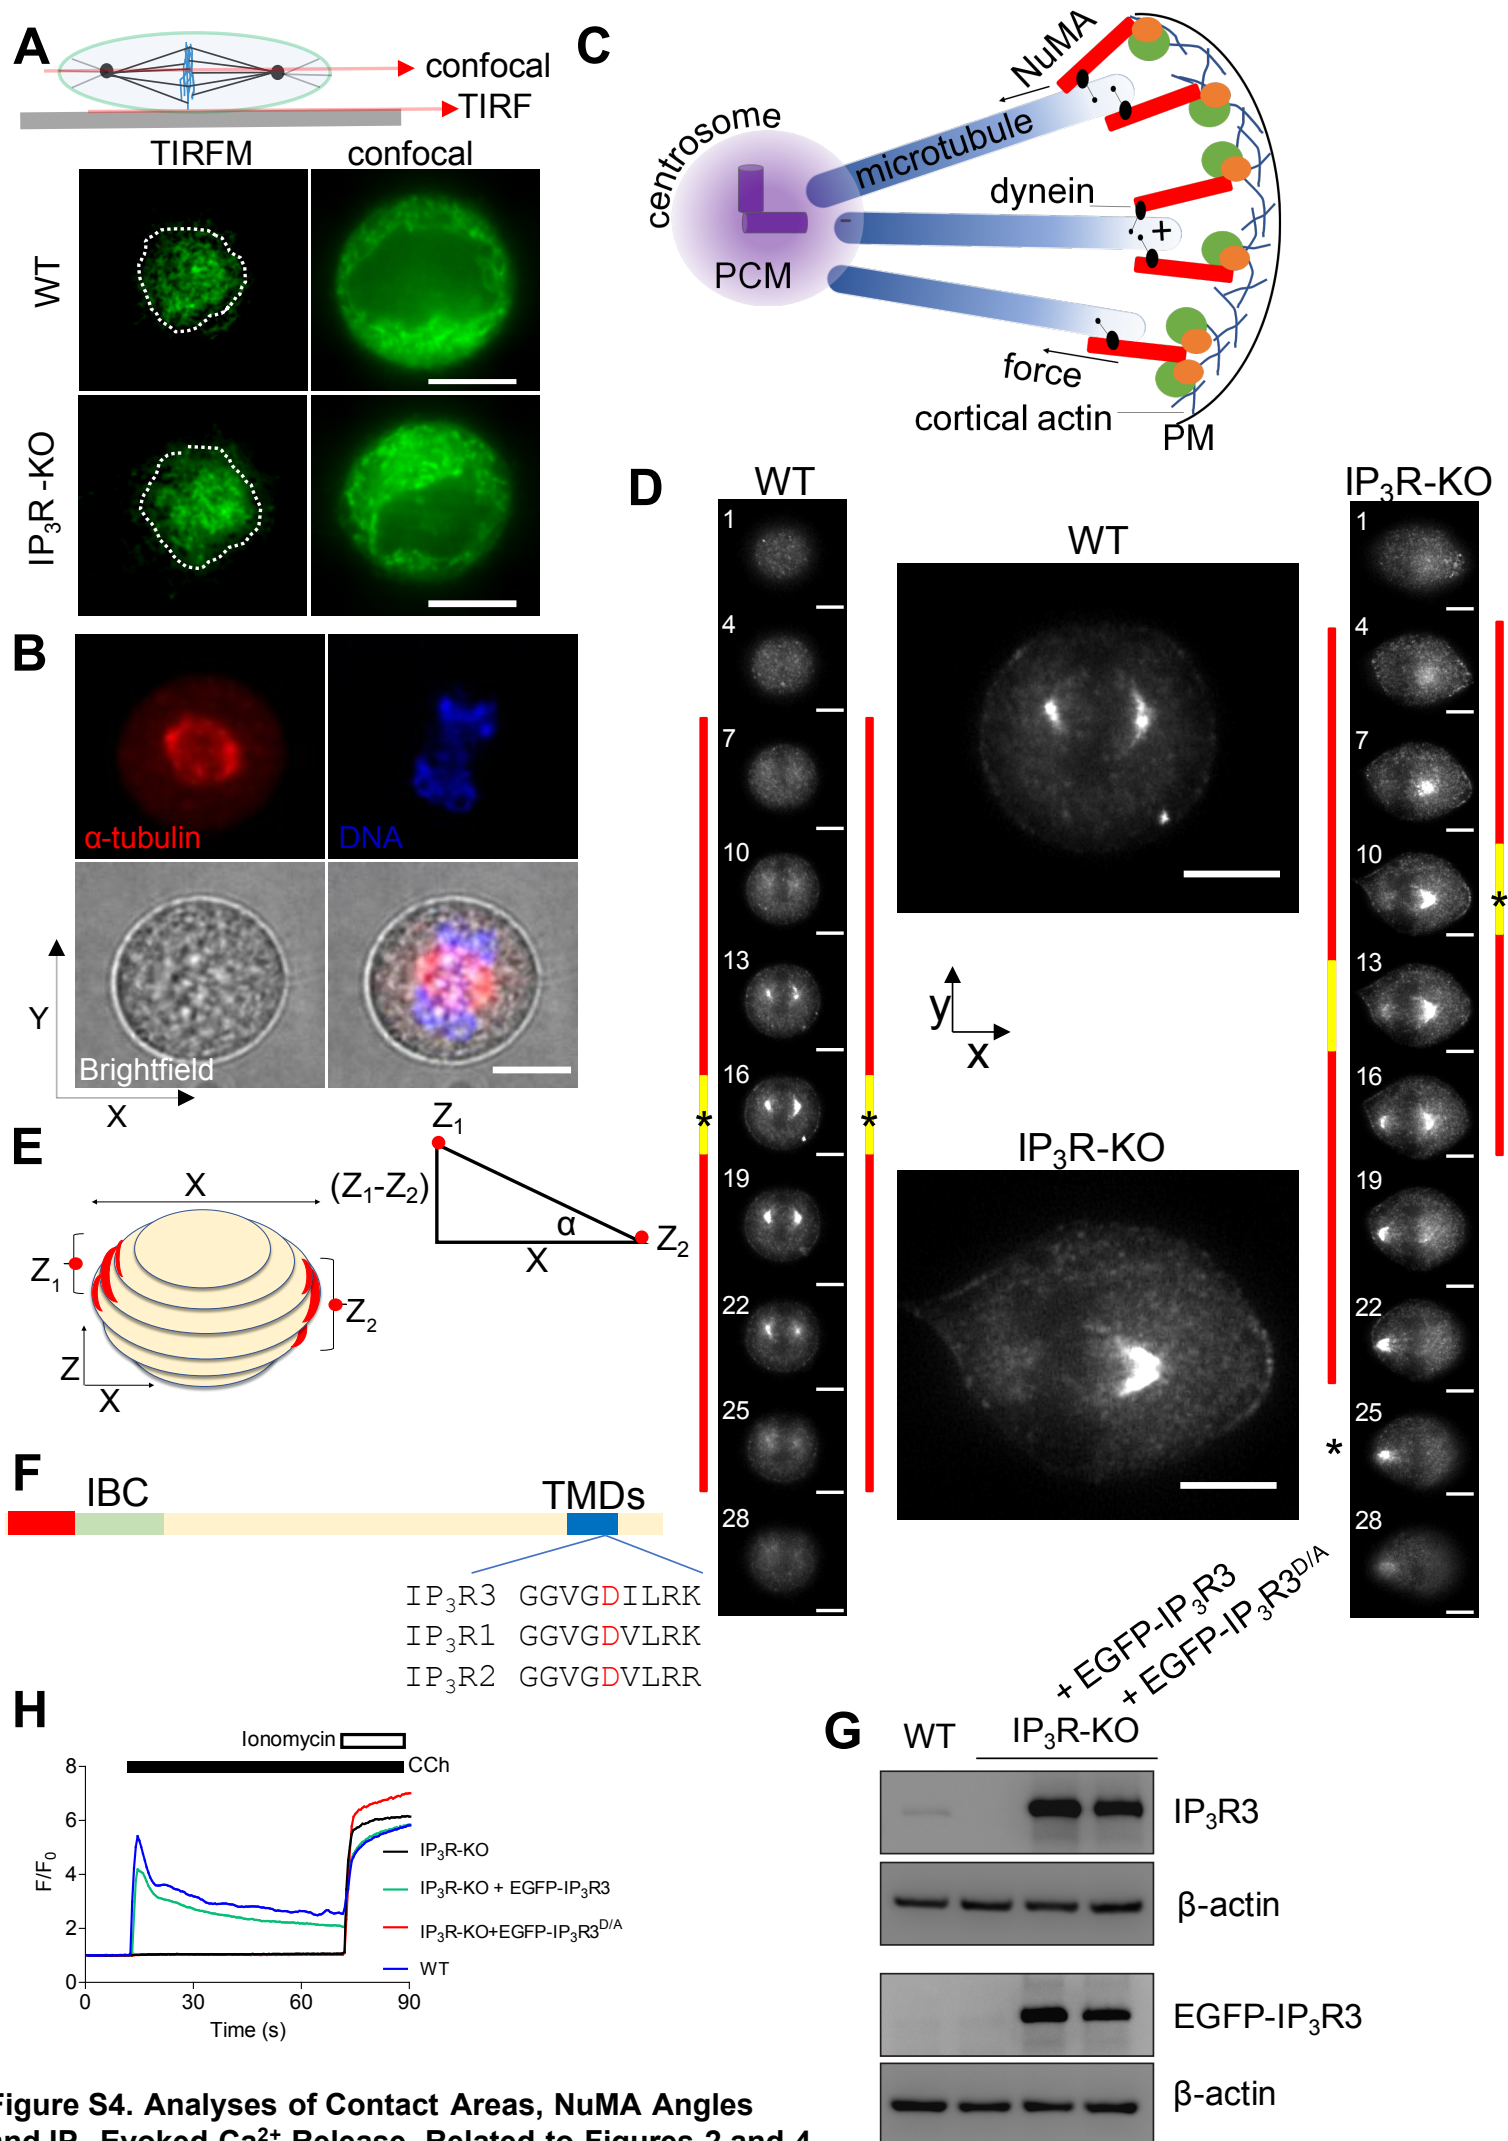

**Figure S4. Analyses of Contact Areas, NuMA Angles and IP<sub>3</sub>-Evoked Ca<sup>2+</sup> Release. Related to Figures 2 and 4.**  
Legend on next page.

**Figure S4. Analyses of Contact Areas, NuMA Angles and IP<sub>3</sub>-Evoked Ca<sup>2+</sup> Release. Related to Figures 2 and 4.**

Figure on preceding page.

(A) Confocal and TIRF microscopy was used to measure contact areas with the substratum for dividing cells with membranes labelled using DHCC (green). Scale bars = 10  $\mu$ m. Summary results in **Figure 2A**.

(B) Typical confocal sections and brightfield images of isolated synchronized WT HEK cell expressing mCherry- $\alpha$ -tubulin and with DNA stained with NucBlue. Scale bar = 10  $\mu$ m. Similar images were used to provide z-stacks from which spindle angles were measured (**Figures 2B-D**).

(C) NuMA links dynein to microtubules, and, through associated proteins, it associates with cortical actin. PCM, pericentriolar material.

(D) Examples of WT and HEK-IP<sub>3</sub>R-KO cells in metaphase immunostained for NuMA. The large images show a single confocal section that includes a centrosome. Small images are sections (numbered from base of cell) showing locations of centrosomes (\*) and the bounds of each NuMA crescent (red bars) and its centre (yellow bars, from which NuMA angles were calculated). NuMA angles were measured between the central points of the NuMA crescents relative to the substratum (**Figures 2E and 2F**). Scale bars = 10  $\mu$ m.

(E) NuMA angles relative to the substratum were calculated as shown. The z-planes in which the centre of each NuMA crescent was located were identified ( $Z_1$  and  $Z_2$ ) and the angle between them ( $\alpha$ ) was calculated.

(F) Location of the mutated residue (D2477 of IP<sub>3</sub>R3) within the selectivity filter that is conserved within all three IP<sub>3</sub>R subtypes and falls within the re-entrant luminal loop linking transmembrane domains (TMD) 5 and 6. IBC, IP<sub>3</sub>-binding core.

(G) Typical western blot (20  $\mu$ g protein/lane) using antibodies to IP<sub>3</sub>R3 (top) or GFP (bottom) of WT HEK cells or HEK-IP<sub>3</sub>R-KO cells expressing the indicated IP<sub>3</sub>R3 proteins. In 4 independent paired analyses, the intensity of the IP<sub>3</sub>R3 band (determined using an Ab for IP<sub>3</sub>R3) for cells expressing EGFP-IP<sub>3</sub>R3<sup>D/A</sup> was  $81.2 \pm 4.5\%$  that from cells expressing EGFP-IP<sub>3</sub>R3.

(H) Ca<sup>2+</sup> signals recorded using Calbryte-590 from HEK cells transiently expressing EGFP-IP<sub>3</sub>R3s. Carbachol (CCh, 100  $\mu$ M) was added to stimulate IP<sub>3</sub> formation through endogenous muscarinic acetylcholine receptors. Ionomycin (100  $\mu$ M) was added to allow saturation of the Ca<sup>2+</sup>-indicator. Results ( $F/F_0$ , where F is fluorescence recorded at each time, and  $F_0$  fluorescence recorded at  $t = 0$ ) are means from at least 22 successfully transfected cells from 3 experiments. The results establish that IP<sub>3</sub>R3<sup>D/A</sup> does not mediate IP<sub>3</sub>-evoked Ca<sup>2+</sup> release (Boehning et al., 2001; Dellis et al., 2008).



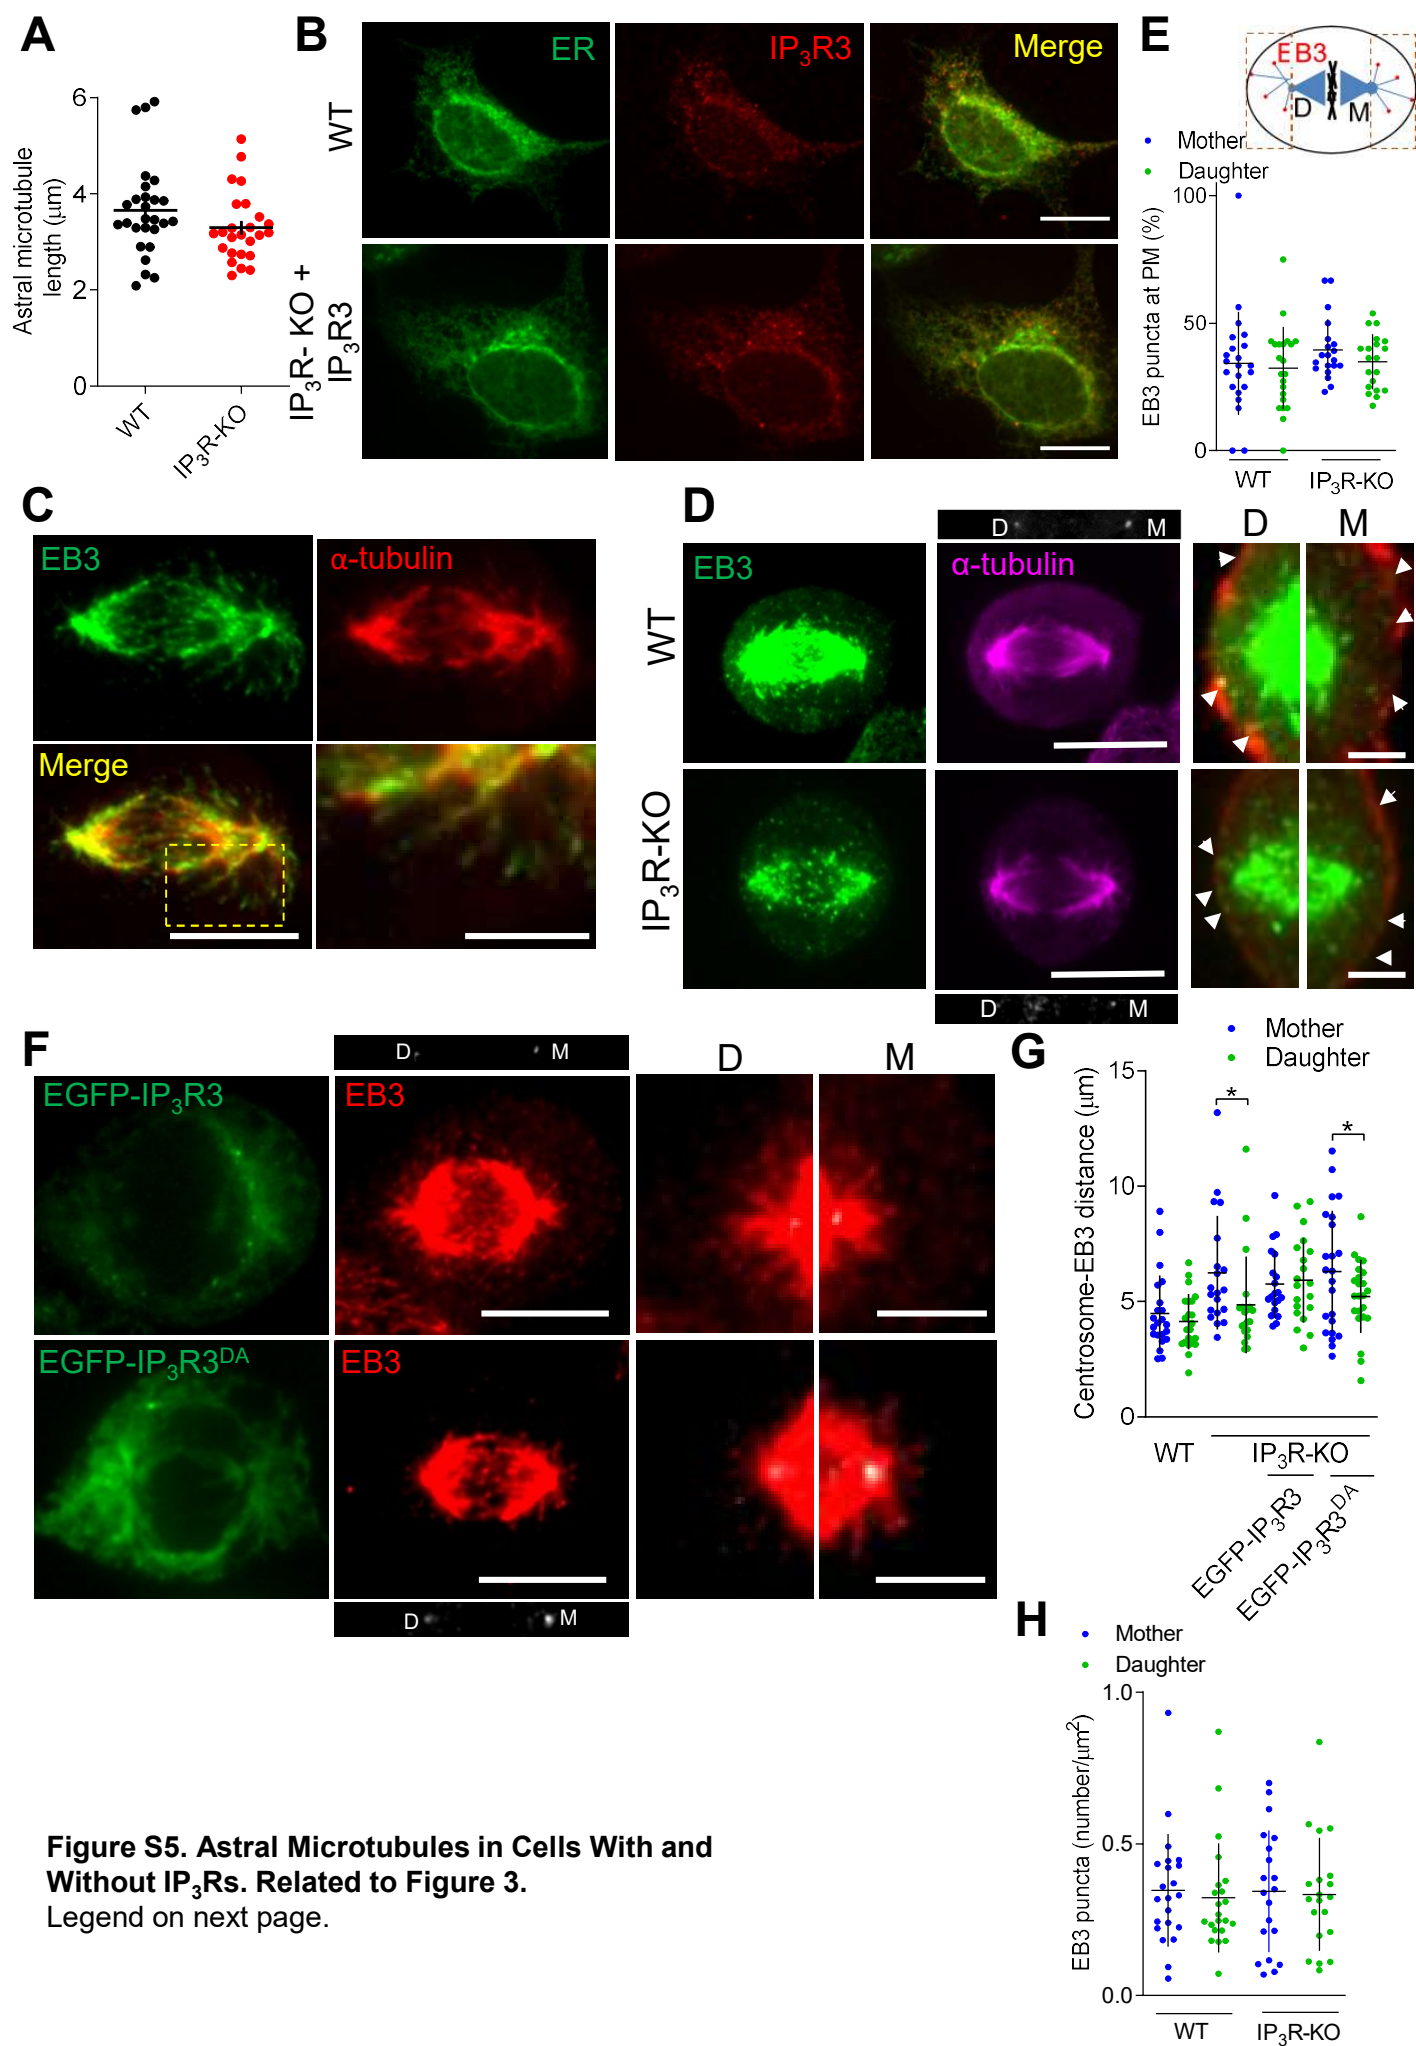

**Figure S5. Astral Microtubules in Cells With and Without  $\text{IP}_3\text{Rs}$ . Related to Figure 3.**

Legend on next page.



**Figure S5. Astral Microtubules in Cells With and Without IP<sub>3</sub>Rs. Related to Figure 3.**

Figure on preceding page.

(A) Z-stacks from confocal sections that included both centrosomes (identified by cenexin staining) (**Figure 3C**) were used to measure lengths of astral microtubules at each pole of each cell (~8 measurements per cell). Results show mean values for each cell (without distinguishing mother and daughter centrosomes), and mean  $\pm$  SEM for all cells. No significant difference between WT and HEK-IP<sub>3</sub>R-KO cells, Student's *t*-test.

(B) Typical confocal images (central plane) show ER (GFP-ER, green) and immunostained IP<sub>3</sub>R3 (red) in interphase WT HEK cells and HEK-IP<sub>3</sub>R-KO cells expressing IP<sub>3</sub>R3. Scale bars = 10  $\mu$ m. Results confirm the similar subcellular distributions of native and heterologously expressed IP<sub>3</sub>R3.

(C) Confocal image of HEK-IP<sub>3</sub>R-KO cell immunostained for EB3 (green) and  $\alpha$ -tubulin (red), showing EB3 capping astral microtubules. Scale bars = 10  $\mu$ m (5  $\mu$ m in enlargement of boxed area).

(D) Maximum intensity z-stack images around centrosome of HEK cells immunostained for EB3 (green),  $\alpha$ -tubulin (magenta) and cenexin (grey), and with the plasma membrane (PM) identified using wheat germ agglutinin (WGA, red). Arrows show EB3 at the cell cortex (PM). Scale bars = 10  $\mu$ m (5  $\mu$ m in enlargements of areas surrounding centrosomes). D, daughter; M, mother.

(E) Summary results show the fraction of EB3 puncta located at the PM around mother and daughter centrosomes (areas shown in the inset) for cells with (WT, *n* = 22 cells) or without IP<sub>3</sub>Rs (IP<sub>3</sub>R-KO, *n* = 20 cells). Results show individual values and mean  $\pm$  SD. No significant difference between any values, one-way ANOVA.

(F) Maximum intensity z-stack images around centrosome immunostained for EB3 (red) and cenexin (grey) in HEK-IP<sub>3</sub>R-KO cells transfected with EGFP-IP<sub>3</sub>R3 or EGFP-IP<sub>3</sub>R3<sup>DA</sup>. GFP-Booster was used to enhance the fluorescence of EGFP. Scale bars = 10  $\mu$ m (5  $\mu$ m in enlargements of regions surrounding centrosomes).

(G) Summary results show distance between centrosomes (cenexin) and EB3 in WT cells and HEK IP<sub>3</sub>R-KO cells alone or after expression of EGFP-IP<sub>3</sub>R3 or EGFP-IP<sub>3</sub>R3<sup>DA</sup>. Results show individual values, mean  $\pm$  SD. \**P* < 0.05, Paired student's *t*-test, mother relative to daughter centrosome.

(H) Numbers of immunostained EB3 puncta (#/ $\mu$ m<sup>2</sup>) identified in regions around each centrosome (see inset to panel E). Results show individual values with mean  $\pm$  SD from 22 (WT) or 20 (IP<sub>3</sub>R-KO) cells. No significant differences, one-way ANOVA.
